# Supplementary material
Source: PubMed Central journal article supplement (PMC3817454)
Supplement: supp_kwt059_kwt059_Steinmaus_Web_Material.Final.pdf [file supp_kwt059_kwt059_Steinmaus_Web_Material.Final.pdf]

**Web Table 1** Transitional cell kidney and ureter cancer odds ratios after various exclusions by categories of highest five-year average arsenic intake ( $\mu\text{g}/\text{day}$ ), Northern Chile, 2007-2010

| <b>Arsenic intake</b>                 | <b>No. Controls</b> | <b>No. Cases</b> | <b>OR<sup>a</sup></b> | <b>95% CI</b> |
|---------------------------------------|---------------------|------------------|-----------------------|---------------|
| Excluding proxy subjects              |                     |                  |                       |               |
| <400                                  | 382                 | 5                | 1.00                  |               |
| 400-1000                              | 126                 | 7                | 5.40                  | 1.50, 19.5    |
| >1000                                 | 76                  | 11               | 12.2                  | 3.97, 37.4    |
| Excluding ureter cancers <sup>b</sup> |                     |                  |                       |               |
| <400                                  | 405                 | 4                | 1.00                  |               |
| 400-1000                              | 141                 | 4                | 3.26                  | 0.72, 14.6    |
| >1000                                 | 94                  | 7                | 9.16                  | 2.50, 33.5    |
| Excluding non-European descent        |                     |                  |                       |               |
| <400                                  | 244                 | 4                | 1.00                  |               |
| 400-1000                              | 117                 | 8                | 5.38                  | 1.39, 20.8    |
| >1000                                 | 84                  | 10               | 8.88                  | 2.55, 30.9    |

Abbreviations: CI, confidence interval; OR, odds ratio.

<sup>a</sup>Odds ratios are adjusted for age, sex, smoking, SES, mining work, and body-mass index.

<sup>b</sup>Includes only transitional cell renal pelvis cancers.

**Web Table 2.** Previously Published Studies of Arsenic in Drinking Water and Kidney Cancer Stratified by High (median  $\geq 100$   $\mu\text{g/L}$ ) or Low (median  $< 100$   $\mu\text{g/L}$ ) Arsenic Water Concentrations

| Study                                                                                                               | Location                          | Outcome <sup>a</sup> | Design         | N  | Exposure assessment                                                                                                 | Exposure level <sup>b</sup>                     | Relative risk (95% CI)                      | Con-founders <sup>d</sup>                 | Water intake <sup>e</sup> | Notes                                                                                                                                             |
|---------------------------------------------------------------------------------------------------------------------|-----------------------------------|----------------------|----------------|----|---------------------------------------------------------------------------------------------------------------------|-------------------------------------------------|---------------------------------------------|-------------------------------------------|---------------------------|---------------------------------------------------------------------------------------------------------------------------------------------------|
| <i>High exposure studies (median arsenic water concentrations <math>\geq 100</math> <math>\mu\text{g/L}</math>)</i> |                                   |                      |                |    |                                                                                                                     |                                                 |                                             |                                           |                           |                                                                                                                                                   |
| Chen <i>et al.</i> , 1985 (females) (1)                                                                             | Taiwan: BFD region                | Mortality            | Ecologic       | 62 | Ecologic: BFD region compared to the rest of Taiwan                                                                 | 780 $\mu\text{g/L}$ (0-2500 $\mu\text{g/L}$ )   | 11.19 (8.38-14.00)                          | Age, sex                                  | No                        | Mortality for 1968-82 84 villages                                                                                                                 |
| Chen <i>et al.</i> , 1985 (males) (1)                                                                               | Taiwan: BFD region                | Mortality            | Ecologic       | 42 | Ecologic: BFD region compared to the rest of Taiwan                                                                 | 780 $\mu\text{g/L}$ (0-2500 $\mu\text{g/L}$ )   | 7.72 (5.37-10.07)                           | Age, sex                                  | No                        | Mortality for 1968-82 84 villages                                                                                                                 |
| Chen <i>et al.</i> , 1988a (males) (2)                                                                              | Taiwan: BFD region                | Mortality            | Ecologic       | -- | Ecologic: median village concentration                                                                              | $<300$ $\mu\text{g/L}$<br>300-599<br>$\geq 600$ | 4.9<br>11.9<br>19.6                         | Age, sex                                  | No                        | CI's not provided<br>Reference group: Taiwan<br>Mortality for 1973-86                                                                             |
| Chen <i>et al.</i> , 1988a (females) (2)                                                                            | Taiwan: BFD region                | Mortality            | Ecologic       | -- | Ecologic: median village concentration                                                                              | $<300$ $\mu\text{g/L}$<br>300-590<br>$\geq 600$ | 4.0<br>13.9<br>37.0                         | Age, sex                                  | No                        | CI's not provided<br>Reference group: Taiwan<br>Mortality for 1973-86                                                                             |
| Chen <i>et al.</i> , 1988b (3)                                                                                      | Taiwan: BFD region                | Mortality            | Cohort 1968-84 | 3  | BFD diagnosis                                                                                                       | BFD patients                                    | 19.53 ( $p>0.05$ )                          | Age, sex                                  | No                        | Reference group: Taiwan<br>No individual data on arsenic                                                                                          |
| Chiou <i>et al.</i> , 2001 (4)                                                                                      | Taiwan: northeast                 | Incidence            | Cohort 1991-96 | 9  | Cross-sectional: one measurement per subject; exposure before age 40 years not assessed; no data in 15% of subjects | 117 $\mu\text{g/L}$ (0-3590 $\mu\text{g/L}$ )   | 2.82 (1.29-5.36)                            | Age, sex                                  | No                        | Limited follow-up period<br>Reference group: Taiwan                                                                                               |
| Chen and Wang, 1990 (males) (5)                                                                                     | Taiwan: 314 precincts & townships | Mortality            | Ecologic       | -- | Ecologic: township or precinct average                                                                              | (0- $\geq 350$ $\mu\text{g/L}$ )                | B=1.1 ( $p<0.05$ ) (regression coefficient) | Age, sex, industrialization, urbanization | No                        | Regression coefficient is mortality/100,000 person-years for each 100 $\mu\text{g/L}$ increase in arsenic in well water.<br>Mortality for 1972-83 |
| Chen and Wang, 1990 (females) (5)                                                                                   | Taiwan: 314 precincts & townships | Mortality            | Ecologic       | -- | Ecologic: township or precinct average                                                                              | (0- $\geq 350$ $\mu\text{g/L}$ )                | B=1.7 ( $p<0.05$ ) (regression coefficient) | Age, sex, industrialization, urbanization | No                        | Regression coefficient is mortality/100,000 person-years for each 100 $\mu\text{g/L}$ increase in arsenic in well water.<br>Mortality for 1972-83 |
| Hopenhayn <i>et al.</i> , 1998 (males) (6)                                                                          | Argentina: Cordoba                | Mortality            | Ecologic       | 53 | Ecologic: counties, based on water measurements and arsenicism                                                      | 178 $\mu\text{g/L}$                             | 1.57 (1.17-2.05)                            | Age, sex                                  | No                        | Mortality for 1986-91<br>Reference group: Argentina                                                                                               |
| Hopenhayn <i>et al.</i> , 1998 (females) (6)                                                                        | Argentina: Cordoba                | Mortality            | Ecologic       | 27 | Ecologic: counties, based on water measurements and arsenicism                                                      | 178 $\mu\text{g/L}$                             | 1.81 (1.19-2.64)                            | Age, sex                                  | No                        | Mortality for 1986-91<br>Reference group: Argentina                                                                                               |
| Smith <i>et al.</i> , 1998 (males) (7)                                                                              | Chile: Region II                  | Mortality            | Ecologic       | 39 | Ecologic: Region II compared to the rest of Chile                                                                   | 568 $\mu\text{g/L}$ (10-860 $\mu\text{g/L}$ )   | 1.6 (1.1-2.1)                               | Age, sex                                  | No                        | Same area as the current study<br>Mortality for 1989-93<br>Reference group: Chile                                                                 |
| Smith <i>et al.</i> , 1998 (females) (7)                                                                            | Chile: Region II                  | Mortality            | Ecologic       | 34 | Ecologic: Region II compared to the rest of Chile                                                                   | 568 $\mu\text{g/L}$ (10-860 $\mu\text{g/L}$ )   | 2.7 (1.9-3.8)                               | Age, sex                                  | No                        | Same area as the current study<br>Mortality for 1989-93<br>Reference group: Chile                                                                 |

| Study                                                                    | Location           | Out-come <sup>a</sup> | Design           | N    | Exposure assessment                                                                     | Exposure level <sup>b</sup>    | Relative risk (95% CI)                               | Con-founders <sup>d</sup>                                    | Water intake <sup>e</sup> | Notes                                                                                                                |
|--------------------------------------------------------------------------|--------------------|-----------------------|------------------|------|-----------------------------------------------------------------------------------------|--------------------------------|------------------------------------------------------|--------------------------------------------------------------|---------------------------|----------------------------------------------------------------------------------------------------------------------|
| Tsai <i>et al.</i> , 1999 (males) (8)                                    | Taiwan: BFD region | Mortality             | Ecologic         | 94   | Ecologic: BFD villages compared to the rest of the county                               | 780 µg/L                       | 6.76 (5.46-8.27)                                     | Age, sex                                                     | No                        | Mortality for 1971-94<br>Reference group: nearby counties                                                            |
| Tsai <i>et al.</i> , 1999 (females) (8)                                  | Taiwan: BFD region | Mortality             | Ecologic         | 128  | Ecologic: BFD villages compared to the rest of the county                               | 780 µg/L                       | 8.89 (7.42-10.57)                                    | Age, sex                                                     | No                        | Mortality for 1971-94<br>Reference group: nearby counties                                                            |
| Wu <i>et al.</i> , 1989 (males) (9)                                      | Taiwan: BFD region | Mortality             | Ecologic         | 26   | Ecologic: median village concentration                                                  | <300 µg/L<br>300-599<br>≥600   | 1.00 (Ref)<br>2.24 (1.12-4.01)<br>3.00 (1.10-6.53)   | Age, sex                                                     | No                        | RRs and CIs estimated using age adjusted rates and Byars approximation.<br>Mortality for 1973-86<br>42 villages      |
| Wu <i>et al.</i> , 1989 (females) (9)                                    | Taiwan: BFD region | Mortality             | Ecologic         | 33   | Ecologic: median village concentration                                                  | <300 µg/L<br>300-599<br>≥600   | 1.00 (Ref)<br>5.68 (3.02-9.71)<br>16.95 (9.68-27.53) | Age, sex                                                     | No                        | RRs and CIs estimated using age adjusted rates and Byars approximation.<br>Mortality for 1973-86<br>42 villages      |
| Yang <i>et al.</i> , 2004 (males) (10)                                   | Taiwan: BFD region | Mortality             | Ecologic         | 135  | Ecologic: BFD region compared to the rest of Taiwan                                     | <10-780 µg/L                   | 6.87 (5.76-8.13)                                     | Age, sex                                                     | No                        | Arsenic levels decreased over time.<br>CIs estimated using Byars approximation.                                      |
| Yang <i>et al.</i> , 2004 (females) (10)                                 | Taiwan: BFD region | Mortality             | Ecologic         | 173  | Ecologic: BFD region compared to the rest of Taiwan                                     | <10-780 µg/L                   | 9.82 (8.41-11.40)                                    | Age, sex                                                     | No                        | Arsenic levels decreased over time.<br>CIs estimated using Byars approximation.                                      |
| Yuan <i>et al.</i> , 2010 (males) (11)                                   | Chile: Region II   | Mortality             | Ecologic         | 39   | Ecologic: Region II compared to unexposed Region V                                      | 569 µg/L<br>(10-860 µg/L)      | 3.37 (2.21-5.11)                                     | Age, sex                                                     | No                        | For 1981-85, SMRs were lower for other 5-year periods.<br>Same area as the current study                             |
| Yuan <i>et al.</i> , 2010 (females) (11)                                 | Chile: Region II   | Mortality             | Ecologic         | 49   | Ecologic: Region II compared to unexposed Region V                                      | 569 µg/L<br>(10-860 µg/L)      | 4.37 (2.98-6.41)                                     | Age, sex                                                     | No                        | For 1991-95, SMRs were lower for other 5-year periods<br>Same area as the current study                              |
| <b>Low exposure studies (arsenic water concentrations &lt; 100 µg/L)</b> |                    |                       |                  |      |                                                                                         |                                |                                                      |                                                              |                           |                                                                                                                      |
| Baastrop <i>et al.</i> , 2008 (12)                                       | Denmark            | Incidence             | Cohort 1970-2003 | 53   | Only exposures after age 41 years used in main analysis; ecologic data in some subjects | 0.7 µg/L<br>(0-25.3 µg/L)      | 0.89 (0.65-1.22)                                     | Age, sex, smoking, education, BMI, occupation                | No                        | Narrow range of mostly low exposures.<br>RRs are per µg/L in time weighted average exposure                          |
| Han <i>et al.</i> , 2009 (13)                                            | US: Idaho          | Incidence             | Ecologic         | 1864 | Ecologic: county averages                                                               | 2 µg/L<br>(0-43 µg/L)          | B=0.03 (p=0.724)<br>(regression coefficient)         | Age, sex, population density, smoking, BMI, white (ecologic) | No                        | Narrow range of mostly low exposures.<br>Regression coefficient are per µg/L arsenic<br>Ecologic data on confounders |
| Hinwood <i>et al.</i> , 1999 (14)                                        | Australia          | Incidence             | Ecologic         | 134  | Ecologic: assessment is unclear                                                         | (0->200 µg/L)                  | < 1.2                                                | Age, sex                                                     | No                        | Results in Figure only: no dose-response relationship.                                                               |
| Kurtio <i>et al.</i> , 1999                                              | Finland            | Incidence             | Case-control     | 49   | Limited individual: arsenic only measured in wells used from 1967-80.                   | <0.2 µg/day<br>0.2-1.0<br>≥1.0 | 1.00<br>0.55 (0.25-1.21)<br>0.94 (0.39-2.27)         | Age, sex, smoking, BMI                                       | Yes                       | Narrow range of mostly low exposures                                                                                 |

| Study                                       | Location     | Out-come <sup>a</sup> | Design         | N   | Exposure assessment                               | Exposure level <sup>b</sup>          | Relative risk (95% CI) | Con-founders <sup>d</sup> | Water intake <sup>e</sup> | Notes                                                                                            |
|---------------------------------------------|--------------|-----------------------|----------------|-----|---------------------------------------------------|--------------------------------------|------------------------|---------------------------|---------------------------|--------------------------------------------------------------------------------------------------|
| Lewis <i>et al.</i> , 1999 (males) (15)     | US: Utah     | Mortality             | Cohort 1945-96 | 9   | Ecologic: median community arsenic concentrations | <1000 µg/L-yrs<br>1000-4999<br>≥5000 | 2.51<br>1.13<br>1.43   | Age, sex                  | No                        | Median arsenic concentrations in the exposed communities ranged from 14-166 µg/L. CIs not given. |
| Lewis <i>et al.</i> , 1999 (females) (15)   | US: Utah     | Mortality             | Cohort 1945-96 | 4   | Ecologic: median community arsenic concentrations | <1000 µg/L-yrs<br>1000-4999<br>≥5000 | 2.36<br>1.32<br>1.13   | Age, sex                  | No                        | Median arsenic concentrations in the exposed communities ranged from 14-166 µg/L. CIs not given. |
| Meliker <i>et al.</i> , 2007 (males) (16)   | US: Michigan | Mortality             | Ecologic       | 325 | Ecologic: exposed counties compared to Michigan   | 7.58 µg/L (3.50-11.98)               | 1.06 (0.91-1.22)       | Age, sex                  | No                        | Narrow range of mostly low exposures.                                                            |
| Meliker <i>et al.</i> , 2007 (females) (16) | US: Michigan | Mortality             | Ecologic       | 194 | Ecologic: exposed counties compared to Michigan   | 7.58 µg/L (3.50-11.98)               | 1.00 (0.82-1.20)       | Age, sex                  | No                        | Narrow range of mostly low exposures.                                                            |

Abbreviations: B, regression coefficient; BFD, blackfoot disease; CI, confidence interval; Ref, reference group; RR, relative risk; SMR, standardized mortality ratio.

<sup>a</sup> Kidney cancer mortality or incidence.

<sup>b</sup> Mean or median arsenic concentration in water (range).

<sup>c</sup> Mean or median arsenic concentration in water in the highest exposure group < 100 µg/L (“low”) or ≥ 100 µg/L (“high”).

<sup>d</sup> Potential confounding variables assessed, either by stratification or statistical adjustment.

<sup>e</sup> Information on water consumption intakes rates collected.

## References for Web Table 2

1. Chen CJ, Chuang YC, Lin TM, Wu HY. Malignant neoplasms among residents of a blackfoot disease-endemic area in Taiwan: high-arsenic artesian well water and cancers. *Cancer Res.* 1985; 45(11 Pt 2):5895-99.
2. Chen CJ, Kuo TL, Wu MM. Arsenic and cancer [letter]. *Lancet.* 1988; 1:414-15.
3. Chen CJ, Wu MW, Lee SS, Wang JD, Cheng SH, Wu HY. Atherogenicity and carcinogenicity of high-arsenic artesian well water: multiple risk factors and related malignant neoplasms of blackfoot disease. *Arteriosclerosis.* 1988; 8:452-60.
4. Chiou H, Chiou S, Hsu Y, Chou Y, Tseng C, Wei M, et al. Incidence of transitional cell carcinoma and arsenic in drinking water: a follow-up study of 8,102 residents in an arseniasis-endemic area in northeastern Taiwan. *Am J Epidemiol.* 2001; 153(5):411-8.
5. Chen C, Wang C. Ecological correlation between arsenic level in well water and age-adjusted mortality from malignant neoplasms. *Cancer Res.* 1990; 50(17):5470-75.
6. Hopenhayn-Rich C, Biggs ML, Smith AH. Lung and kidney cancer mortality associated with arsenic in drinking water in Córdoba, Argentina. *Int J Epidemiol.* 1998; 27(4):561-69.
7. Smith AH, Goycolea M, Haque R, Biggs ML. Marked increase in bladder and lung cancer mortality in a region of Northern Chile due to arsenic in drinking water. *Am. J. Epidemiol.* 1998; 147(7):660-69.
8. Tsai SM, Wang TN, Ko YC. Mortality for certain diseases in areas with high levels of arsenic in drinking water. *Arch Environ Health.* 1999; 54(3):186-93.

9. Wu MM, Kuo TL, Hwang YH, Chen CJ. Dose-response relation between arsenic concentration in well water and mortality from cancers and vascular diseases. *Am J Epidemiol.* 1989; 130(6):1123-32.
10. Yang CY, Chiu HF, Wu TN, Chuang HY, Ho SC. Reduction in kidney cancer mortality following installation of a tap water supply system in an arsenic-endemic area of Taiwan. *Archives of environmental health.* 2004; 59(9):484-8.
11. Yuan Y, Marshall G, Ferreccio C, Steinmaus C, Liaw J, Bates M, et al. Kidney cancer mortality: fifty-year latency patterns related to arsenic exposure. *Epidemiology.* 2010; 21(1):103-8.
12. Bastrup R, Sorensen M, Balstrom T, Frederiksen K, Larsen CL, Tjonneland A, et al. Arsenic in drinking-water and risk for cancer in Denmark. *Environmental health perspectives.* 2008; 116(2):231-7.
13. Han YY, Weissfeld JL, Davis DL, Talbott EO. Arsenic levels in ground water and cancer incidence in Idaho: an ecologic study. *International archives of occupational and environmental health.* 2009; 82(7):843-9.
14. Hinwood AL, Jolley DJ, Sim MR. Cancer incidence and high environmental arsenic concentrations in rural populations: results of an ecologic study. *Inter J Environ Health Res.* 1999; 9:131-41.
15. Lewis D, Southwick J, Ouellet-Hellstrom R, Rench J, Calderon R. Drinking water arsenic in Utah: a cohort mortality study. *Environ Health Perspect.* 1999; 107(5):359-65.
16. Meliker JR, Wahl RL, Cameron LL, Nriagu JO. Arsenic in drinking water and cerebrovascular disease, diabetes mellitus, and kidney disease in Michigan: a standardized mortality ratio analysis. *Environ Health.* 2007; 6:4.
